# Supplementary material for: Inland fish and fisheries integral to achieving the Sustainable Development Goals
Source: Springer Nature journal article supplement (doi:10.1038/s41893-020-0517-6), 2020-05-04
Supplement: 41893_2020_517_MOESM1_ESM.pdf [file 41893_2020_517_MOESM1_ESM.pdf]

In the format provided by the authors and unedited.

# Inland fish and fisheries integral to achieving the Sustainable Development Goals

Abigail J. Lynch <sup>1</sup>✉, Vittoria Elliott<sup>2</sup>, Sui C. Phang<sup>3,9</sup>, Julie E. Claussen<sup>4</sup>, Ian Harrison <sup>5</sup>,  
Karen J. Murchie<sup>6</sup>, E. Ashley Steel<sup>7</sup> and Gretchen L. Stokes <sup>8</sup>

---

<sup>1</sup>U.S. Geological Survey, National Climate Adaptation Science Center, Reston, VA, USA. <sup>2</sup>National Museum of Natural History, Smithsonian Institution, Washington, DC, USA. <sup>3</sup>Evolution, Ecology and Organismal Biology, The Ohio State University, Columbus, OH, USA. <sup>4</sup>Fisheries Conservation Foundation, Champaign, IL, USA. <sup>5</sup>Conservation International, Arlington, VA, USA. <sup>6</sup>Daniel P. Haerther Center for Conservation and Research, John G. Shedd Aquarium, Chicago, IL, USA. <sup>7</sup>School of Aquatic and Fisheries Sciences, College of the Environment, University of Washington, Seattle, WA, USA. <sup>8</sup>School of Natural Resources & Environment, University of Florida, Gainesville, FL, USA. <sup>9</sup>Present address: Faculty of Business and Law, University of Portsmouth, Portsmouth, UK. ✉e-mail: [ajlynch@usgs.gov](mailto:ajlynch@usgs.gov)

## Supplementary Methods

*Correlations among inland fishery services.* We calculated the correlation of relationships to the SDG targets among inland fishery services using Pearson's correlation coefficient the *rcor* in the *Hmisc* packages in R (v3.5.1<sup>1</sup>). We chose Pearson's correlation coefficient over non-parametric approaches because the underlying scores (0 for no relationship; 1 for positive relationship; 2 for strongly positive relationship; -1 for bidirectional relationship; -2 for strongly bidirectional relationship) reflect a directional and strength-based relationship which is quantitative in nature. We did not test any hypotheses related to these correlation coefficients; therefore, assumptions of normality were unnecessary.

*Inland fishery services clusters.* We generated summary clusters from the matrix of the SDGs for each grouping using an agglomerative hierarchical clustering approach and the *complete linkage* method to find similar clusters. The height (y-axis) of the resulting dendrogram represents the dissimilarity between clusters of targets. Clusters differentiated by at least half the maximum height value were considered significant associations with inland fishery services. Computations were performed in R (v3.5.1<sup>1</sup>) using *hclust* in the *stats* package.

1. R Core Team. R: A language and environment for statistical computing. (2018).
